# Supplementary material
Source: HighWire-hosted journal article supplement (https://www.cmajopen.ca/highwire/filestream/84461/field_highwire_adjunct_files/0/2020-0055-1-at.pdf)
Supplement: 2020-0055-1-at.pdf [file 2020-0055-1-at.pdf]

## Appendix 1 (as supplied by the authors): List of the provincial databases and ethics approvals for each site

| Site                    | Databases                                                                                    |                                           |                                              |                                                                                                       |                                                                                                                                        | Ethics                                                                             |
|-------------------------|----------------------------------------------------------------------------------------------|-------------------------------------------|----------------------------------------------|-------------------------------------------------------------------------------------------------------|----------------------------------------------------------------------------------------------------------------------------------------|------------------------------------------------------------------------------------|
|                         | Provincial health insurance registry                                                         | Physician service claims                  | Prescription drug claims                     | Emergency department records                                                                          | Hospital discharge abstracts                                                                                                           |                                                                                    |
| <b>British Columbia</b> | Client Roster Information (Client Registry System / Enterprise Master Patient Index)         | Medical Services Plan Payment Information | PharmaNet                                    | NA                                                                                                    | DAD                                                                                                                                    | Clinical Research Ethics Board, University of British Columbia                     |
| <b>Alberta</b>          | Population Registry                                                                          | Practitioner Claims                       | Pharmaceutical Information Network Dispenses | Ambulatory Care Classification System File (including Emergency Department visits and Day Procedures) | DAD                                                                                                                                    | Conjoint Health Research Ethics Board at the University of Calgary                 |
| <b>Saskatchewan</b>     | Person Health Registration System                                                            | Medical Services Billing                  | Prescription Drug Plan Historical Claims     | National Ambulatory Care Reporting System                                                             | CIHI Discharge Abstract Database                                                                                                       | Biomedical Research Ethics Board, University of Saskatchewan.                      |
| <b>Manitoba</b>         | Manitoba Health Insurance Registry Database                                                  | Medical Services Database                 | Drug Program Information Network             | NA                                                                                                    | Hospital Abstracts User Manual Database (prior to April 1, 2004)<br>DAD/Manitoba Abstract Data Elements Database (since April 1, 2004) | Health Research Ethics Board, University of Manitoba                               |
| <b>Ontario</b>          | OHIP Registered Persons Database                                                             | OHIP Claims History Database              | Ontario Drug Benefit Plan Database           | CIHI National Ambulatory Care Reporting System                                                        | CIHI Discharge Abstract Database                                                                                                       | Ethics exemption*                                                                  |
| <b>Quebec</b>           | RAMQ - Information personne assurée<br>RAMQ - Période d'admissibilité - assurance médicament | RAMQ - Services médicaux                  | RAMQ - Services pharmaceutiques              | NA                                                                                                    | † MED-ECHO - Séjours hospitaliers                                                                                                      | Comité d'éthique de la recherché du Centre hospitalier de l'Université de Montréal |
| <b>Nova Scotia</b>      | Insured patient registry                                                                     | MSI physician billings                    | Pharmacare                                   | MSI physician billings                                                                                | CIHI DAD                                                                                                                               | Health Science Research Ethics Board                                               |

Abbreviations: NA: not applicable; DAD: Discharge Abstract Data; CIHI: Canadian Institute for Health Information; OHIP: Ontario Health Insurance Plan; RAMQ: Régie de l'assurance maladie; Med-Echo: Maintenance et Exploitation des Données pour l'Étude de la Clientèle Hospitalière; MSI: Medical Services Insurance

\*The use of data in this project was authorized under section 45 of Ontario's Personal Health Information Protection Act, which does not require review by a Research Ethics Board.

† The DAD is used across Canada, except for in QC.
